# Supplementary material
Source: PubMed Central journal article supplement (PMC4413763)
Supplement: ASN.2014030302_ASN2014030302SupplementaryData.pdf [file ASN.2014030302_ASN2014030302SupplementaryData.pdf]

## **Appendices**

**Appendix 1:** Dialysis status over time among prior live organ donors and matched controls listed for kidney transplantation in the United States

| <b>Year Listed for Kidney Transplantation</b> | <b>Number of prior donors on dialysis at listing (%)</b> | <b>Number of matched controls on dialysis at listing (%)</b> |
|-----------------------------------------------|----------------------------------------------------------|--------------------------------------------------------------|
| <b>1996 - 1999</b>                            | 23 (72)                                                  | 18 (60)                                                      |
| <b>2000 - 2003</b>                            | 34 (72)                                                  | 33 (83)                                                      |
| <b>2004 - 2007</b>                            | 53 (65)                                                  | 56 (69)                                                      |
| <b>2008 - 2010</b>                            | 44 (56)                                                  | 59 (67)                                                      |

**Appendix 2:** Kaplan-Meier Estimates of Time to Deceased Donor Kidney Transplantation among Prior Organ Donors and Matched Non-donor Candidates (Censoring for death and living donor kidney transplantation)

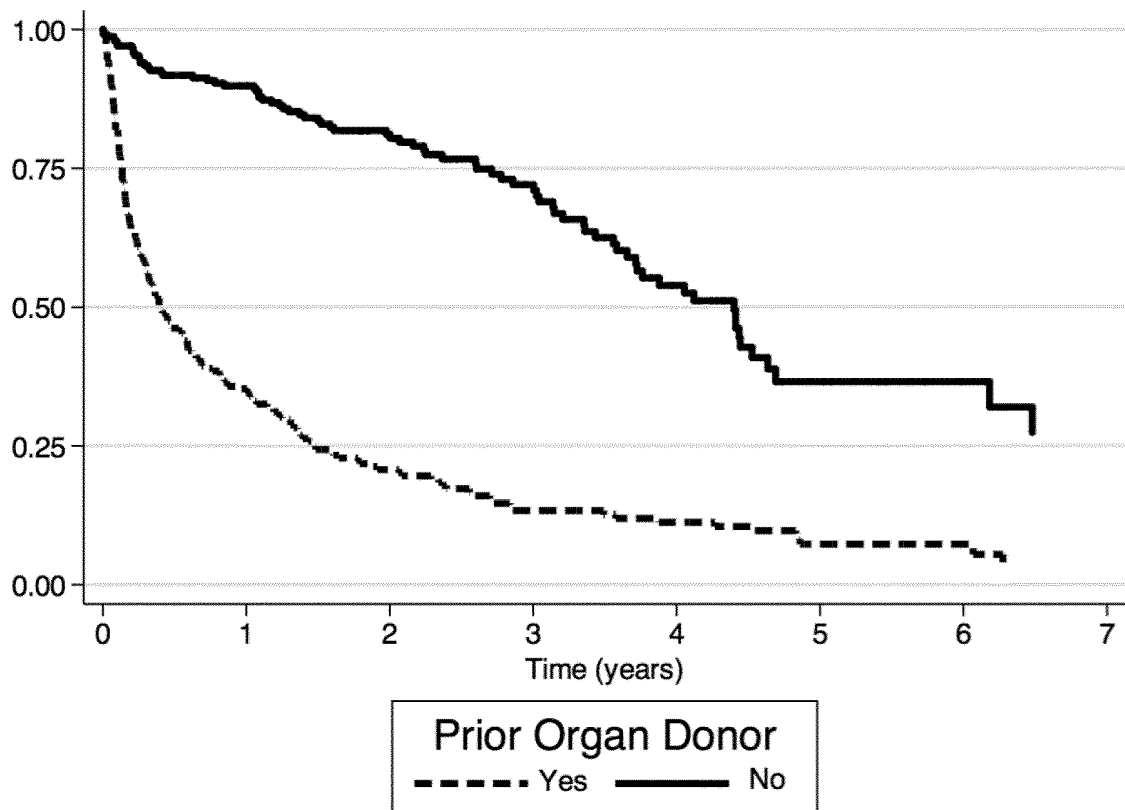

**Appendix 3: Sensitivity Analysis Estimating the Effect of an Unmeasured Confounder on the Hazard for Death**

| <b>Prevalence among Donors</b> | <b>Prevalence among Non-Donors</b> | <b>Unmeasured Confounder HR</b> | <b>HR for death associated with prior live donor status after adjusting for Unmeasured Confounder (95% CI)</b> |
|--------------------------------|------------------------------------|---------------------------------|----------------------------------------------------------------------------------------------------------------|
| 0.1                            | 0.2                                | 1.2                             | 0.26 (0.11-0.58)                                                                                               |
| 0.1                            | 0.4                                | 1.2                             | 0.27 (0.11-0.60)                                                                                               |
| 0.1                            | 0.6                                | 1.2                             | 0.28 (0.12-0.63)                                                                                               |
| 0.1                            | 0.2                                | 2.0                             | 0.27 (0.12-0.62)                                                                                               |
| 0.1                            | 0.4                                | 2.0                             | 0.32 (0.14-0.72)                                                                                               |
| 0.1                            | 0.6                                | 2.0                             | 0.36 (0.16-0.83)                                                                                               |
| 0.2                            | 0.4                                | 2.0                             | 0.29 (0.13-0.67)                                                                                               |
| 0.2                            | 0.6                                | 2.0                             | 0.33 (0.15-0.76)                                                                                               |
| 0.3                            | 0.5                                | 3.0                             | 0.31 (0.14-0.71)                                                                                               |
| 0.3                            | 0.6                                | 3.0                             | 0.34 (0.15-0.78)                                                                                               |
| 0.2                            | 0.4                                | 5.0                             | 0.36 (0.16-0.82)                                                                                               |
| 0.1                            | 0.4                                | 5.0                             | 0.46 (0.20-1.06)                                                                                               |

Abbreviations: HR—Hazard Ratio; CI—Confidence Interval
